# Supplementary material
Source: PubMed Central journal article supplement (PMC5912470)
Supplement: 10.1074_M117.816793_jbc.M117.816793-1.pdf [file 10.1074_M117.816793_jbc.M117.816793-1.pdf]

Structure-function analyses unravel distinct effects of allosteric inhibitors of HIV-1 integrase on viral maturation and integration

**Damien Bonnard, Erwann Le Rouzic, Sylvia Eiler, Céline Amadori, Igor Orlov, Jean-Michel Bruneau, Julie Brias, Julien Barbion, Francis Chevreuil, Danièle Spehner, Sophie Chasset, Benoit Ledoussal, François Moreau, Ali Saïb, Bruno P. Klaholz, Stéphane Emiliani, Marc Ruff, Alessia Zamborlini, and Richard Benarous**

### **Supplemental Data**

Table S1. Data collection and refinement statistics.

Table S2: Summary of structure analysis results.

Table S3: Primary HIV-1 isolates used in this study.

Table S4: Amino acid sequence of integrases from lab strains and primary isolates.

Figure S1: Multiple alignment of primary HIV-1 isolates used in this study.

Supplementary Reference

**Table S1. Data collection and refinement statistics.** Each data set was collected from one single crystal. Values in parentheses are for the outer shell.

|                             | IN CCD AA<br>(50-212)<br>(PDB entry 5OI3)               | MUT-A/IN CCD TT<br>(50-212)<br>(PDB entry 5OI2)         | MUT-A/IN CCD AA<br>(50-212)<br>(PDB entry 5OI8)         | MUT-A03/IN CCD<br>TT (50-212)<br>(PDB entry 5OI5)       | MUT-A03/IN CCD<br>AA (50-212)<br>(PDB entry 5OIA)       |
|-----------------------------|---------------------------------------------------------|---------------------------------------------------------|---------------------------------------------------------|---------------------------------------------------------|---------------------------------------------------------|
| Data collection             |                                                         |                                                         |                                                         |                                                         |                                                         |
| Xray wavelength (Å)         | 1.0000                                                  | 1.0000                                                  | 1.5418                                                  | 1.0000                                                  | 1.0000                                                  |
| Space group                 | <i>P3<sub>1</sub>21</i>                                 | <i>P3<sub>1</sub>21</i>                                 | <i>P3<sub>1</sub>21</i>                                 | <i>P3<sub>1</sub>21</i>                                 | <i>P3<sub>1</sub>21</i>                                 |
| Unit cell parameters (Å)    | a=b=72.27 ; c=65.76<br>$\alpha=\beta=90$ ; $\gamma=120$ | a=b=72.06 ; c=65.85<br>$\alpha=\beta=90$ ; $\gamma=120$ | a=b=72.66 ; c=66.17<br>$\alpha=\beta=90$ ; $\gamma=120$ | a=b=73.06 ; c=65.89<br>$\alpha=\beta=90$ ; $\gamma=120$ | a=b=72.67 ; c=66.29<br>$\alpha=\beta=90$ ; $\gamma=120$ |
| Resolution range (Å)        | 36.2–1.9 (2.0–1.9)                                      | 45.4–2.2 (2.3–2.2)                                      | 62.93–2.0 (2.07–2.00)                                   | 36.6–2.0 (2.13–2.0)                                     | 62.87–1.9 (2.0–1.9)                                     |
| No. of measured reflections | 88,879 (9774)                                           | 100,553 (16215)                                         | 66,722 (2080)                                           | 75,097 (9342)                                           | 95,910 (11864)                                          |
| No. of unique reflections   | 26,873 (3298)                                           | 19,478 (3111)                                           | 13,944 (694)                                            | 23,646 (3300)                                           | 29,016 (4018)                                           |
| Completeness (%)            | 88.7 (67.3)                                             | 99.6 (97.6)                                             | 99.1 (99.9)                                             | 89.2 (77.5)                                             | 93.9 (80.1)                                             |
| Mean I/ $\sigma$ (I)        | 12.37 (3.17)                                            | 19.05 (2.88)                                            | 28.44 (1.13)                                            | 11.58 (1.03)                                            | 28.44 (1.13)                                            |
| Multiplicity                | 3.3 (2.3)                                               | 5.2 (5.2)                                               | 4.78 (3.00)                                             | 3.2 (2.8)                                               | 3.3 (2.9)                                               |
| R <sub>merge</sub> (%)      | 5.6 (24.8)                                              | 5.4 (51.3)                                              | 5.9 (97.5)                                              | 5.6 (137.0)                                             | 4.6 (129.4)                                             |
| Refinement statistics       |                                                         |                                                         |                                                         |                                                         |                                                         |
| Resolution range (Å)        | 36.18–2.3 (2.36–2.3)                                    | 45.4–2.2 (2.6–2.2)                                      | 62.93–2.35 (2.41–2.35)                                  | 36.6–2.4 (2.46–2.4)                                     | 62.87–2.2 (2.26–2.2)                                    |
| Reflections used            | 8663 (645)                                              | 9882 (726)                                              | 8,189 (626)                                             | 7673 (596)                                              | 9,967 (697)                                             |
| R factor (%)                | 19.635 (29.700)                                         | 17.65 (30.0)                                            | 18.711 (18.5)                                           | 20.8 (15.7)                                             | 18.326 (42.5)                                           |
| R <sub>free</sub> (%)       | 27.197 (35.800)                                         | 21.999 (34.6)                                           | 24.367 (26.6)                                           | 26.1 (26.5)                                             | 22.514 (44.8)                                           |
| R.m.s. deviation            |                                                         |                                                         |                                                         |                                                         |                                                         |
| Bond lengths (Å)            | 0.017                                                   | 0.018                                                   | 0.017                                                   | 0.016                                                   | 0.020                                                   |
| Bond angles (°)             | 1.682                                                   | 2.098                                                   | 2.003                                                   | 1.838                                                   | 2.077                                                   |
| Ramachandran plot (%)       |                                                         |                                                         |                                                         |                                                         |                                                         |
| Most favoured regions       | 99.2                                                    |                                                         | 99.2                                                    | 100.0                                                   | 99.2                                                    |
| Allowed regions             | 0.8                                                     |                                                         | 0.8                                                     | 0.0                                                     | 0.8                                                     |

**Table S2: Summary of structure analysis results.**

| Structure            | Structure analysis results |              |                                           |                        |                                           |                |                            |                           |         | Biological assay results              |                                           |                                                         |                                                    |
|----------------------|----------------------------|--------------|-------------------------------------------|------------------------|-------------------------------------------|----------------|----------------------------|---------------------------|---------|---------------------------------------|-------------------------------------------|---------------------------------------------------------|----------------------------------------------------|
|                      | Number of residues         |              | H-Bonds and salt bridges at the interface |                        | Solvent accessible Area (Å <sup>2</sup> ) |                | Solvation Energy(kcal/mol) |                           |         | Ligand Binding free energy (kcal/mol) | LEDGF-IN inhibition IC <sub>50</sub> (μM) | IN multimerization AC <sub>50</sub> (μM) <i>Plateau</i> | MT4 multiple-round infection EC <sub>50</sub> (μM) |
|                      | Interface                  | Surface      | Number of H-Bonds                         | Number of salt bridges | Interface                                 | Total          | Isolated Structure         | Gain on complex formation | P value |                                       |                                           |                                                         |                                                    |
| IN CCD TT            | 42<br>32.1%                | 126<br>96.2% | 12                                        | 12                     | 1447.4<br>19.7%                           | 7365.5<br>100% | -117.5<br>100%             | -8.9<br>7.5%              | 0.310   |                                       |                                           |                                                         |                                                    |
| IN CCD AA            | 40<br>30.5%                | 123<br>93.9% | 12                                        | 6                      | 1446.3<br>19.5%                           | 7307.4<br>100% | -120.7<br>100%             | -7.8<br>6.4%              | 0.413   |                                       |                                           |                                                         |                                                    |
| IN CCD TT<br>MUT-A   | 40<br>30.5%                | 122<br>93.1% | 10                                        | 4                      | 1312.4<br>18.3%                           | 7172.4<br>100% | -118.8<br>100%             | -8.6<br>6.7%              | 0.268   | 0.21                                  | 0.14                                      | 0.12<br>532%                                            | 0.047                                              |
| IN CCD TT<br>MUT-A03 | 38<br>29%                  | 126<br>96.2% | 8                                         | 10                     | 1366.2<br>18.4%                           | 7415.1<br>100% | -116.9<br>100%             | -9.2<br>7.9%              | 0.222   | 0.21                                  | 0.19                                      | 0.37<br>600%                                            | 0.45                                               |
| IN CCD AA<br>MUT-A   | 39<br>29.8%                | 126<br>96.2% | 10                                        | 4                      | 1403.3<br>18.9%                           | 7417<br>100%   | -121.3<br>100%             | -9.1<br>7.5%              | 0.220   | -5.97                                 | 0.15                                      | 0.21<br>87%                                             | 2.3                                                |
| IN CCD AA<br>MUT-A03 | 39<br>29.8%                | 125<br>95.4% | 6                                         | 2                      | 1363.8<br>18.8%                           | 7267.7<br>100% | -118.3<br>100%             | -9.3<br>7.8%              | 0.223   | 0.21                                  | 0.17                                      | 0.34<br>670%                                            | 0.36                                               |

**Table S3: Primary HIV-1 isolates used in this study.**

These isolates were obtained from the NIH AIDS Research & Reference Reagent Program.

| Isolate | Clade    | 124-125 | NIH Reference | Tropism | Accession |
|---------|----------|---------|---------------|---------|-----------|
| KER2008 | A        | AA      | 11242         | Dual    | AF457052  |
| 33931N  | B        | TT      | 11250         | R5      | AY713410  |
| NP1538  | B        | NA      | 11252         | R5      | AY713408  |
| NP1525  | CRF01-AE | AA      | 11274         | Dual    | AY713420  |

**Table S4: Amino acid sequence of integrases from lab strains and primary isolates.**

Amino-acid residues 124 and 125 in bold face.

| Strain  | Amino acid sequence of integrases from lab strains and primary isolates                                                                                                                                                                                                                                                         |
|---------|---------------------------------------------------------------------------------------------------------------------------------------------------------------------------------------------------------------------------------------------------------------------------------------------------------------------------------|
| NL4-3   | FLDGDIDKAQEEHEKYHSNWRAMASDFNLPPVVAKEIVASCDKQCQLKGEAMHGQVDCSPGIWQLD<br>CTHLEGKVIILVAVHVASGYIEAEVIPAETGQETAYFLLKLAGRWPVKTIVHTDNGSNFTS <b>TT</b> VKA<br>ACWWAGIKQEFGIPYNPQSQGVIESMNKELKKIIGQVRDQAEHLKTAVQMAVFIHNFKRKGGIG<br>GYSAGERIVDIIATDIQTKELQKQITKIQNFRVYYRDSRDPVWKGPAKLLWKGEAVVIQDNSD<br>IKVVPRRKAKIIRDYGKQ MAGDDCVASRQDED   |
| HxB2    | FLDGDIDKAQDEHEKYHSNWRAMASDFNLPPVVAKEIVASCDKQCQLKGEAMHGQVDCSPGIWQLD<br>CTHLEGKVIILVAVHVASGYIEAEVIPAETGQETAYFLLKLAGRWPVKTIVHTDNGSNFTG <b>AT</b> VRA<br>ACWWAGIKQEFGIPYNPQSQGVVESMNKELKKIIGQVRDQAEHLKTAVQMAVFIHNFKRKGGIG<br>GYSAGERIVDIIATDIQTKELQKQITKIQNFRVYYRDSRNP LWKGP AKLLWKGEAVVIQDNSD<br>IKVVPRRKAKIIRDYGKQ MAGDDCVASRQDED |
| KER2008 | FLDGDIDKAQEEHEKYHSNWRAMASDFNIPPIIAKEIVASCDKQCQLKGEAMHGQVDCSPGMWQLD<br>CTHLEGKVIILVAVHVASGYIEAEVIPAETGQETAYFLLKLAGRWPVKKVHTDNGSNFTS <b>AA</b> FKA<br>ACWWANVQQEYEGIPYNPQSQGVVESMNKELKKIIGQVRDQAEHLKTAVQMAVFIHNFKRKGGIG<br>GYSAGERIIDIIASDIQTKELQKQITKIQNFRVYYRDSRDP LWKGP AKLLWKGEAVVIQDNSD<br>IKVVPRRKAKIIRDYGKQ MAGDDCVAGRQDED |
| 33931N  | FLDGDIDKAQEEHEKYHSNWRAMASDFNLPPVVAKEIVASCDKQCQLKGEAMHGQVDCSPGIWQLD<br>CTHLEGKVIILVAVHVASGYIEAEVIPAETGQDTAYFLLKLAGRWPVKTIVHTDNGSNFTS <b>TT</b> VKA<br>ACWWAGIKQEFGIPYNPQSQGVVESMNKELKKIIGQVRDQAEHLKTAVQMAVFIHNFKRKGGIG<br>EYSAGERIIDIIATDIQTKELQKQITKIQNFRVYYRDNDRP LWKGP AKLLWKGEAVVIQDNSD<br>IKVVPRRKAKIIRDYGKQ MAGDDCVASRQDED |
| NP1538  | FLDGDIDKAQEEHEKYHSNWRAMASDFNLPPVVAKEIVASCDKQCQLKGEAMHGQVDCSPGIWQLD<br>CTHLEEKIILVAVHVASGYIEAEVIPAETGQETAYFLLKLAGRWPVKTIVHTDNGRNFTS <b>NA</b> VKA<br>ACWWAGIKQEFGIPYNPQSQGVVESMNKELKKIIGQVRDQAEHLKTAVQMAVFIHNFKRKGGIG<br>GYSAGERIVDIIATDIQTRELQKQITKIQNFRVYYRDSRDP LWKGP AKLLWKGEAVVIQDNSD<br>IKVVPRRKAKIIRDYGKQ MAGDDCVASRQDED  |
| NP1525  | FLDGDIDKAQEEHEKYHSNWRAMASDFNLPPVVAKEIVANCDKQCQLKGEAMHGQVDCSPGIWQLD<br>CTHLEGKVIILVAVHVASGYIEAEVIPAETGQETAYFLLKLAGRWPVKVIHTDNGSNFTS <b>AA</b> VKA<br>ACWWANVQQEYEGIPYNPQSQGVVESMNKELKKIIGQVREQAEHLKTAVQMAVFIHNFKRKGGIG<br>GYSAGERIIDIIATDIQTKELQKQITKIQNFRVYYRDSRDP IWKGP AKLLWKGEAVVIQDNSD<br>IKVVPRRKAKIIRDYGKQ MAGDDCVAGRQDED |

**Figure S1: Multiple alignment of primary HIV-1 isolates used in this study.**  
Generated with Multalin (<http://multalin.toulouse.inra.fr/multalin/>) (1)

| Symbol comparison table: blosum62 |            |            |            | Consensus symbols:    |            |            |      |     |
|-----------------------------------|------------|------------|------------|-----------------------|------------|------------|------|-----|
|                                   |            |            |            | ! is anyone of IV     |            |            |      |     |
|                                   |            |            |            | \$ is anyone of LM    |            |            |      |     |
|                                   |            |            |            | % is anyone of FY     |            |            |      |     |
|                                   |            |            |            | # is anyone of NDQEBZ |            |            |      |     |
| MSF:                              | 288        | Check:     | 0          |                       |            |            |      |     |
| Name:                             | NL4-3-B    | Len:       | 288        | Check:                | 8559       | Weight:    | 0.85 |     |
| Name:                             | HXB2-B     | Len:       | 288        | Check:                | 8075       | Weight:    | 0.85 |     |
| Name:                             | 33931N-B   | Len:       | 288        | Check:                | 7049       | Weight:    | 0.99 |     |
| Name:                             | NP1538-B   | Len:       | 288        | Check:                | 8037       | Weight:    | 1.07 |     |
| Name:                             | KER2008-A  | Len:       | 288        | Check:                | 7556       | Weight:    | 1.11 |     |
| Name:                             | NP1525-AE  | Len:       | 288        | Check:                | 7392       | Weight:    | 1.11 |     |
| Name:                             | Consensus  | Len:       | 288        | Check:                | 2683       | Weight:    | 0.00 |     |
| //                                |            |            |            |                       |            |            |      |     |
|                                   |            |            |            | 1                     |            |            |      | 60  |
| NL4-3-B                           | FLDGIDKAQE | EHEKYHSNWR | AMASDFNLPP | VVAKEIVASC            | DKCQLKGEAM | HGQVDCSPGI |      |     |
| HXB2-B                            | FLDGIDKAQD | EHEKYHSNWR | AMASDFNLPP | VVAKEIVASC            | DKCQLKGEAM | HGQVDCSPGI |      |     |
| 33931N-B                          | FLDGIDKAQE | EHEKYHSNWR | AMASDFNLPP | IVAKEIVASC            | DKCQLKGEAM | HGQVDCSPGI |      |     |
| NP1538-B                          | FLDGIDKAQE | EHEKYHSNWR | AMASDFNLPP | VVAKEIVASC            | DKCQLKGEAM | HGQVDCSPGI |      |     |
| KER2008-A                         | FLDGIDKAQE | EHERYHSNWR | AMASDFNIPP | IIAKEIVASC            | DKCQLKGEAM | HGQVDCSPGI |      |     |
| NP1525-AE                         | FLDGIDKAQE | EHERYHSNWR | TMASDFNLPP | IVAKEIVANC            | DKCQLKGEAM | HGQVDCSPGI |      |     |
| Consensus                         | FLDGIDKAQ# | EHEkYhsNR  | aMASDFNlPP | !!AKEIVAsC            | DKCQLKGEAM | HGQVDCSPGi |      |     |
|                                   |            |            |            |                       |            |            |      |     |
|                                   |            |            |            | 61                    |            |            |      | 120 |
| NL4-3-B                           | WQLDCTHLEG | KVILVAVHVA | SGYIEAEVIP | AETGQETAYF            | LLKLAGRWPV | KTVHTDNGSN |      |     |
| HXB2-B                            | WQLDCTHLEG | KVILVAVHVA | SGYIEAEVIP | AETGQETAYF            | LLKLAGRWPV | KTIHTDNGSN |      |     |
| 33931N-B                          | WQLDCTHLEG | KIILVAVHVA | SGYIEAEVIP | AETGQDTAYF            | LLKLAGRWPV | KTIHTDNGSN |      |     |
| NP1538-B                          | WQLDCTHLEE | KIILVAVHVA | SGYIEAEVIP | AETGQETAYF            | LLKLAGRWPV | KTIHTDNGRN |      |     |
| KER2008-A                         | WQLDCTHLEG | KVILVAVHVA | SGYIEAEVIP | AETGQETAYF            | LLKLAGRWPV | KVVHTDNGSN |      |     |
| NP1525-AE                         | WQLDCTHLEG | KVILVAVHVA | SGYIEAEVIP | AETGQETAYF            | LLKLAGRWPV | KVIHTDNGSN |      |     |
| Consensus                         | WQLDCTHLEG | K!ILVAVHVA | SGYIEAEVIP | AETGQ#TAYF            | LLKLAGRWPV | Kt!HTDNGsN |      |     |
|                                   |            |            |            |                       |            |            |      |     |
|                                   |            |            |            | 121                   |            |            |      | 180 |
| NL4-3-B                           | FTSTTVKAAC | WWAGIKQEFQ | IPYNPQSQGV | IESMNKELKK            | IIGQVRDQAE | HLKTAVQMAV |      |     |
| HXB2-B                            | FTGATVRAAC | WWAGIKQEFQ | IPYNPQSQGV | VESMNKELKK            | IIGQVRDQAE | HLKTAVQMAV |      |     |
| 33931N-B                          | FTSTTVKAAC | WWAGIKQEFQ | IPYNPQSQGV | VESMNKELKK            | IIGQVRDQAE | HLKTAVQMAV |      |     |
| NP1538-B                          | FTSNAVKAAC | WWAGIKQEFQ | IPYNPQSQGV | VESMNKELKK            | IIGQVRDQAE | HLKTAVQMAV |      |     |
| KER2008-A                         | FTSAAFKAAC | WWANVQQEYG | IPYNPQSQGV | VESMNKELKK            | IIGQVRDQAE | HLKTAVQMAV |      |     |
| NP1525-AE                         | FTSAAVKAAC | WWANVQQEFG | IPYNPQSQGV | VESMNKELKK            | IIGQVREQAE | HLKTAVQMAV |      |     |
| Consensus                         | FTsaavkAAC | WWAg!kQE%G | IPYNPQSQGV | !ESMNKELKK            | IIGQVR#QAE | HLKTAVQMAV |      |     |
|                                   |            |            |            |                       |            |            |      |     |
|                                   |            |            |            | 181                   |            |            |      | 240 |
| NL4-3-B                           | FIHNFKRKGG | IGGYSAGERI | VDIIATDIQT | KELQKQITKI            | QNFRVYYRDS | RDPVWKGPAK |      |     |
| HXB2-B                            | FIHNFKRKGG | IGGYSAGERI | VDIIATDIQT | KELQKQITKI            | QNFRVYYRDS | RNP1WKGPAK |      |     |
| 33931N-B                          | FIHNFKRKGG | IGEYSAGERI | IDIIATDIQT | KELQKQITKI            | QNFRVYYRDN | RDPLWKGPAK |      |     |
| NP1538-B                          | FIHNFKRKGG | IGGYSAGERI | VDIIATDIQT | RELQKQITKI            | QNFRVYYRDS | RDPLWKGPAK |      |     |
| KER2008-A                         | FIHNFKRKGG | IGGYSAGERI | IDIIASDIQT | KELQKQITKI            | QNFRVYYRDS | RDPLWKGPAK |      |     |
| NP1525-AE                         | FIHNFKRKGG | IGGYSAGERI | IDIIATDIQT | KELQKQITKI            | QNFRVYYRDS | RDP1WKGPAK |      |     |
| Consensus                         | FIHNFKRKGG | IGgYSAGERI | !DIIAtDIQT | kELQKQITKI            | QNFRVYYRDS | R#P1WKGPAK |      |     |
|                                   |            |            |            |                       |            |            |      |     |
|                                   |            |            |            | 241                   |            |            |      | 288 |
| NL4-3-B                           | LLWKGEHAVV | IQDNSDIKVV | PRRKAKIIRD | YGKQAGDDC             | VASRQDED   |            |      |     |
| HXB2-B                            | LLWKGEHAVV | IQDNSDIKVV | PRRKAKIIRD | YGKQAGDDC             | VASRQDED   |            |      |     |
| 33931N-B                          | LLWKGEHAVV | IQDNSDIKVV | PRRKAKIIRD | YGKQAGDDC             | VASRQDED   |            |      |     |
| NP1538-B                          | LLWKGEHAVV | IQDNSDIKVV | PRRKAKIIRD | YGKQAGDDC             | VASRQDED   |            |      |     |
| KER2008-A                         | LLWKGEHAVV | IQDNSDIKVV | PRRKAKIIRD | YGKQAGDDC             | VAGRQDED   |            |      |     |
| NP1525-AE                         | LLWKGEHAVV | IQDNSDIKVV | PRRKAKIIRD | YGKQAGDDC             | VAGRQDED   |            |      |     |
| Consensus                         | LLWKGEHAVV | IQDNSDIKVV | PRRKAKIIRD | YGKQAGDDC             | VAsRQ#ED   |            |      |     |

## Supplementary Reference

1. Corpet, F. (1988) Multiple sequence alignment with hierarchical clustering. *Nucleic Acids Res.* **16**, 10881-90
